# Supplementary material
Source: publisher figshare collection journal article supplement (https://karger.figshare.com/articles/dataset/_/4929533)
Supplement: Supplementary file 1 [file 1]

## Electronic supplementary material (ESM)

### ESM tables

ESM table 1: Crude and age-adjusted hospital admission-based incidence rates (per 100,000 population) with CI 95%, by age group and by sex, 2003- 2012.

|        | Age Group | 0-4   | 5- 14 | 15-24 | 25-44 | 45- 64 | 65- 84 | 85+   | Total | Total age-adjusted | CI 95%        |
|--------|-----------|-------|-------|-------|-------|--------|--------|-------|-------|--------------------|---------------|
| Female | 2003      | 496,6 | 245,5 | 217,5 | 117,6 | 116,4  | 218,1  | 415,6 | 187,9 | 199,2              | (195,0-203,6) |
|        | 2004      | 492,9 | 242,0 | 211,4 | 109,1 | 112,7  | 213,2  | 482,7 | 183,7 | 194,1              | (189,9-198,4) |
|        | 2005      | 498,8 | 227,0 | 192,4 | 104,1 | 114,7  | 214,7  | 512,2 | 180,1 | 188,1              | (184,0-192,3) |
|        | 2006      | 484,3 | 205,1 | 179,4 | 89,5  | 105,7  | 209,6  | 500,9 | 168,4 | 174,4              | (170,4-178,4) |
|        | 2007      | 455,7 | 207,0 | 176,2 | 92,7  | 106,8  | 215,9  | 501,8 | 169,4 | 173,3              | (169,4-177,3) |
|        | 2008      | 450,7 | 212,7 | 160,5 | 85,7  | 105,3  | 228,7  | 487,8 | 167,8 | 169,7              | (165,9-173,7) |
|        | 2009      | 431,6 | 201,0 | 137,1 | 80,0  | 99,6   | 220,4  | 519,4 | 159,9 | 158,9              | (155,2-162,7) |
|        | 2010      | 457,7 | 196,3 | 137,7 | 70,9  | 97,8   | 230,2  | 526,0 | 160,6 | 158,3              | (154,6-162,0) |
|        | 2011      | 446,9 | 181,2 | 123,2 | 72,4  | 95,0   | 231,6  | 581,3 | 158,8 | 152,6              | (149,0-156,3) |
|        | 2012      | 409,6 | 177,1 | 117,1 | 67,6  | 90,2   | 233,3  | 601,2 | 154,7 | 145,5              | (142,0-149,1) |
|        | Average   | 461,4 | 209,6 | 164,5 | 89,1  | 104,0  | 221,5  | 518,6 | 168,9 | 171,2              | (167,3-175,1) |
| Male   | 2003      | 582,1 | 409,8 | 439,3 | 243,7 | 189,0  | 262,6  | 550,7 | 299,9 | 327,6              | (322,2-333,1) |
|        | 2004      | 585,6 | 394,6 | 416,5 | 228,6 | 189,0  | 260,3  | 644,9 | 290,8 | 317,5              | (312,2-322,9) |

|       |         |       |       |       |       |       |       |       |       |       |               |
|-------|---------|-------|-------|-------|-------|-------|-------|-------|-------|-------|---------------|
|       | 2005    | 561,9 | 369,1 | 377,0 | 210,8 | 182,2 | 263,9 | 633,0 | 274,7 | 298,1 | (292,9-303,3) |
|       | 2006    | 581,4 | 349,0 | 352,2 | 204,3 | 173,9 | 257,2 | 618,7 | 265,3 | 288,1 | (283,0-293,2) |
|       | 2007    | 523,8 | 337,4 | 368,5 | 199,0 | 184,6 | 265,5 | 608,3 | 265,1 | 284,8 | (279,8-289,8) |
|       | 2008    | 519,3 | 326,6 | 331,7 | 186,8 | 168,2 | 268,3 | 625,5 | 251,9 | 269,9 | (265,1-274,8) |
|       | 2009    | 515,7 | 335,1 | 298,4 | 168,4 | 160,3 | 271,8 | 631,5 | 242,2 | 258,9 | (254,2-263,7) |
|       | 2010    | 508,8 | 321,6 | 257,3 | 158,1 | 159,0 | 277,7 | 679,6 | 233,8 | 246,6 | (242,0-251,2) |
|       | 2011    | 485,7 | 305,4 | 268,9 | 156,1 | 159,5 | 290,8 | 740,8 | 234,6 | 244,5 | (240,0-249,1) |
|       | 2012    | 517,4 | 281,9 | 226,8 | 141,8 | 153,5 | 277,0 | 773,9 | 222,4 | 230,0 | (225,7-234,5) |
|       | Average | 536,8 | 343,2 | 332,4 | 190,0 | 171,2 | 269,7 | 661,6 | 257,6 | 276,3 | (271,4-281,3) |
| Total | 2003    | 540,3 | 329,5 | 330,1 | 181,4 | 152,6 | 237,2 | 450,4 | 242,7 | 263,9 | (260,4-267,4) |
|       | 2004    | 540,3 | 320,0 | 315,5 | 169,5 | 150,8 | 233,4 | 524,6 | 236,1 | 256,1 | (252,7-259,6) |
|       | 2005    | 531,1 | 299,6 | 286,0 | 158,0 | 148,4 | 235,9 | 544,2 | 226,4 | 243,3 | (240,0-246,7) |
|       | 2006    | 534,0 | 278,6 | 267,0 | 147,5 | 139,7 | 230,2 | 533,0 | 215,9 | 231,5 | (228,3-234,8) |
|       | 2007    | 490,5 | 273,6 | 273,6 | 146,4 | 145,6 | 237,5 | 531,7 | 216,2 | 229,3 | (226,1-232,5) |
|       | 2008    | 485,7 | 270,9 | 247,1 | 136,7 | 136,7 | 245,9 | 527,3 | 209,0 | 220,0 | (216,9-223,2) |
|       | 2009    | 474,6 | 269,5 | 218,7 | 124,6 | 129,9 | 242,9 | 552,0 | 200,2 | 209,1 | (206,1-212,1) |
|       | 2010    | 483,8 | 260,3 | 198,3 | 114,9 | 128,4 | 251,1 | 571,3 | 196,5 | 202,5 | (199,6-205,5) |
|       | 2011    | 466,7 | 244,6 | 196,9 | 114,5 | 127,2 | 257,7 | 628,9 | 196,0 | 198,6 | (195,7-201,5) |
|       | 2012    | 464,8 | 230,6 | 172,6 | 105,0 | 121,8 | 252,8 | 653,3 | 187,9 | 187,9 | (185,1-190,7) |
|       | Average | 499,9 | 277,8 | 249,6 | 140,0 | 137,6 | 242,5 | 559,1 | 212,3 | 223,9 | (220,8-227,1) |

ESM table 2: Crude and age-adjusted hospital admission-based mortality rates (per 100,000 population) with CI 95%, by age group and by sex, 2003- 2012.

|        | Age     | 0-4 | 5- 14 | 15-24 | 25-44 | 45-  | 65-  | 85+   | Total | Total<br>age- | CI 95%     |
|--------|---------|-----|-------|-------|-------|------|------|-------|-------|---------------|------------|
| Female | 2003    | 2,1 | 1,5   | 3,6   | 2,3   | 4,3  | 20,0 | 65,8  | 7,4   | 4,5           | (4,0-5,1)  |
|        | 2004    | 1,8 | 0,5   | 2,4   | 1,8   | 3,6  | 18,1 | 81,0  | 6,8   | 3,8           | (3,3-4,3)  |
|        | 2005    | 2,5 | 0,8   | 1,9   | 1,2   | 4,3  | 19,6 | 78,0  | 7,0   | 3,9           | (3,4-4,4)  |
|        | 2006    | 1,4 | 1,2   | 2,2   | 1,2   | 3,5  | 17,9 | 78,8  | 6,7   | 3,6           | (3,2-4,1)  |
|        | 2007    | 1,4 | 0,8   | 1,3   | 1,4   | 4,9  | 20,8 | 74,2  | 7,4   | 3,9           | (3,5-4,4)  |
|        | 2008    | 2,4 | 0,2   | 2,0   | 1,4   | 3,5  | 20,4 | 84,4  | 7,4   | 3,8           | (3,3-4,2)  |
|        | 2009    | 1,3 | 1,0   | 3,4   | 1,7   | 5,0  | 21,4 | 95,1  | 8,6   | 4,6           | (4,1-5,1)  |
|        | 2010    | 1,0 | 0,5   | 2,0   | 1,7   | 4,3  | 23,0 | 85,0  | 8,2   | 4,1           | (3,7-4,6)  |
|        | 2011    | 1,0 | 1,0   | 1,1   | 0,6   | 3,4  | 22,3 | 98,2  | 8,0   | 3,6           | (3,2-4,0)  |
|        | 2012    | 0,9 | 0,0   | 1,5   | 0,6   | 4,3  | 22,1 | 105,1 | 8,6   | 3,7           | (3,3-4,1)  |
|        | Average | 1,6 | 0,8   | 2,1   | 1,4   | 4,1  | 20,5 | 86,0  | 7,6   | 4,0           | (3,5-4,5)  |
| Male   | 2003    | 3,4 | 1,3   | 11,0  | 7,8   | 9,1  | 34,3 | 139,4 | 12,2  | 9,9           | (9,1-10,8) |
|        | 2004    | 1,4 | 1,3   | 9,4   | 6,5   | 12,6 | 36,2 | 151,0 | 12,7  | 10,0          | (9,2-10,9) |
|        | 2005    | 4,1 | 1,6   | 6,9   | 5,1   | 9,3  | 36,7 | 153,1 | 11,5  | 8,9           | (8,1-9,7)  |
|        | 2006    | 2,0 | 0,8   | 9,2   | 7,0   | 11,0 | 32,3 | 124,6 | 11,8  | 9,3           | (8,5-10,1) |
|        | 2007    | 2,7 | 1,5   | 8,8   | 6,8   | 10,1 | 37,0 | 139,2 | 12,5  | 9,6           | (8,9-10,5) |
|        | 2008    | 2,3 | 2,1   | 7,3   | 5,8   | 10,1 | 38,5 | 150,1 | 12,6  | 9,4           | (8,6-10,2) |
|        | 2009    | 1,6 | 1,5   | 7,0   | 6,1   | 10,4 | 39,8 | 151,7 | 12,9  | 9,4           | (8,7-10,2) |
|        | 2010    | 4,0 | 1,5   | 4,4   | 4,9   | 7,4  | 42,0 | 194,4 | 12,6  | 8,7           | (8,0-9,4)  |
|        | 2011    | 2,4 | 1,1   | 7,6   | 5,4   | 9,1  | 44,1 | 179,5 | 13,6  | 9,6           | (8,8-10,3) |
|        | 2012    | 2,4 | 0,3   | 5,7   | 3,9   | 9,1  | 39,2 | 187,1 | 12,5  | 8,3           | (7,6-9,0)  |
|        | Average | 2,6 | 1,3   | 7,7   | 6,0   | 9,8  | 38,0 | 160,7 | 12,5  | 9,3           | (8,6-10,1) |
| Total  | 2003    | 2,8 | 1,4   | 7,4   | 5,1   | 6,7  | 26,1 | 84,8  | 9,7   | 7,0           | (6,6-7,5)  |
|        | 2004    | 1,6 | 0,9   | 6,0   | 4,2   | 8,1  | 25,8 | 99,1  | 9,7   | 6,7           | (6,3-7,2)  |

|  |         |     |     |     |     |     |      |       |      |     |           |
|--|---------|-----|-----|-----|-----|-----|------|-------|------|-----|-----------|
|  | 2005    | 3,3 | 1,2 | 4,4 | 3,2 | 6,8 | 27,0 | 97,8  | 9,2  | 6,2 | (5,8-6,6) |
|  | 2006    | 1,7 | 1,0 | 5,7 | 4,1 | 7,2 | 24,1 | 91,3  | 9,2  | 6,3 | (5,9-6,8) |
|  | 2007    | 2,0 | 1,2 | 5,1 | 4,2 | 7,5 | 27,8 | 92,5  | 9,9  | 6,6 | (6,2-7,1) |
|  | 2008    | 2,3 | 1,2 | 4,7 | 3,6 | 6,8 | 28,3 | 103,3 | 9,9  | 6,4 | (6,0-6,9) |
|  | 2009    | 1,5 | 1,3 | 5,2 | 3,9 | 7,7 | 29,4 | 111,6 | 10,7 | 6,8 | (6,4-7,3) |
|  | 2010    | 2,5 | 1,0 | 3,2 | 3,3 | 5,8 | 31,3 | 117,2 | 10,4 | 6,2 | (5,8-6,6) |
|  | 2011    | 1,7 | 1,1 | 4,4 | 3,0 | 6,3 | 31,9 | 122,5 | 10,8 | 6,4 | (6,0-6,8) |
|  | 2012    | 1,7 | 0,2 | 3,6 | 2,3 | 6,7 | 29,7 | 129,9 | 10,5 | 5,8 | (5,5-6,2) |
|  | Average | 2,1 | 1,0 | 5,0 | 3,7 | 6,9 | 28,2 | 107,1 | 10,0 | 6,5 | (6,0-6,9) |
