# Supplementary material
Source: publisher figshare collection journal article supplement (https://karger.figshare.com/articles/dataset/_/4929533)
Supplement: Supplementary file 2 [file 1 › 471877_sm2.PDF]

ESM Figures

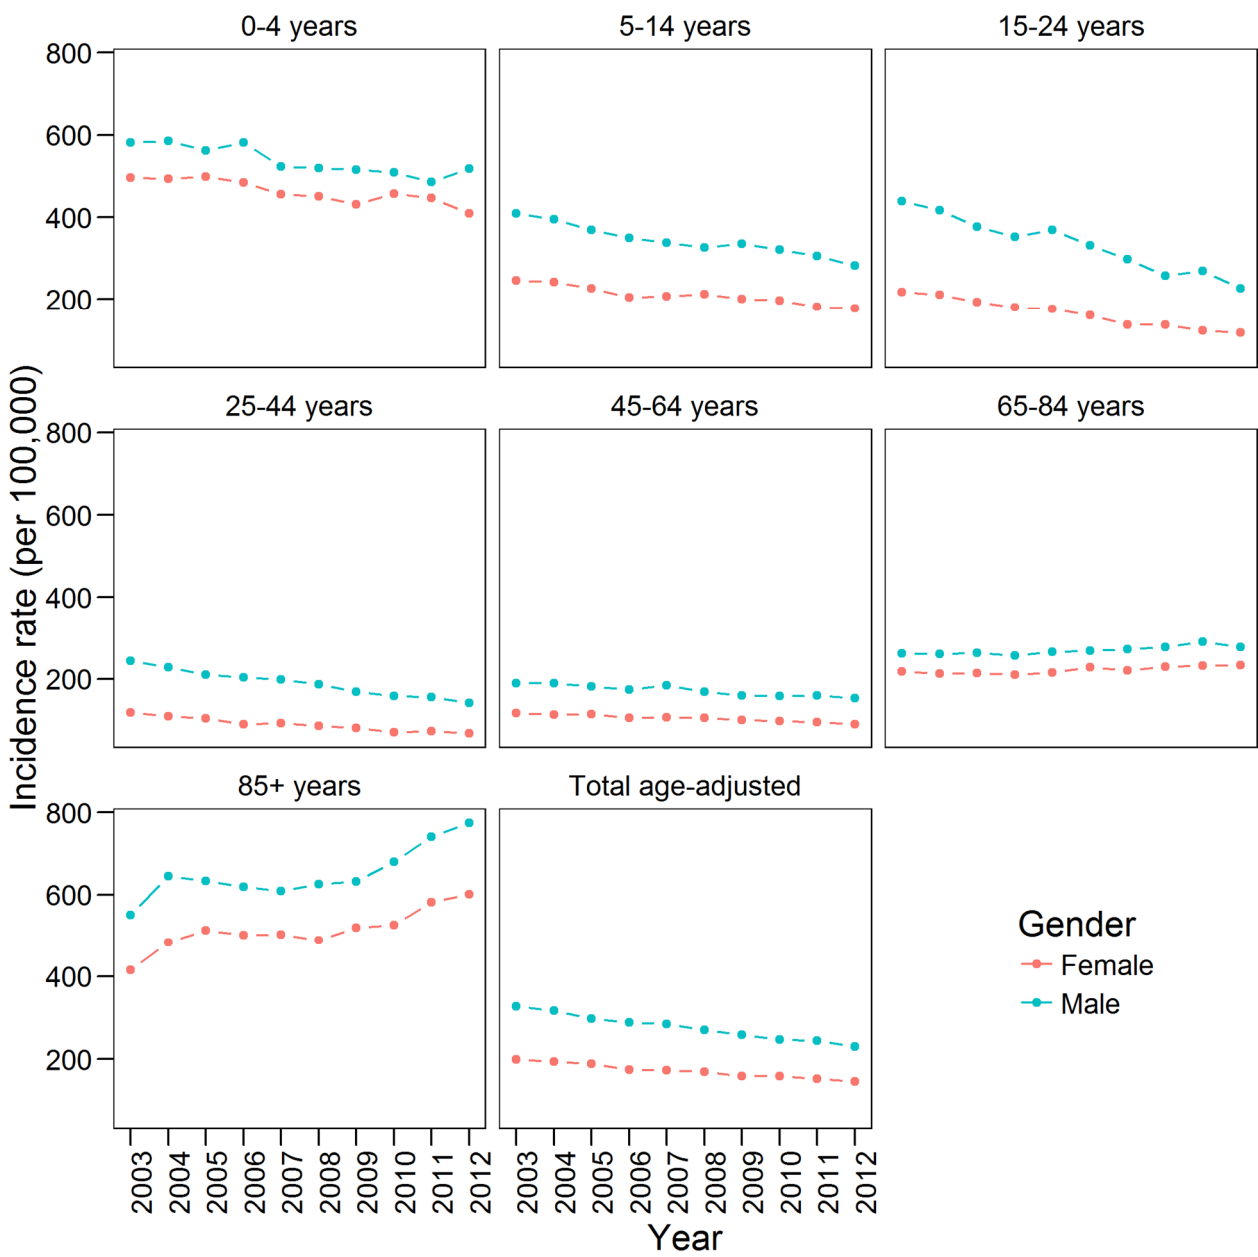

ESM figure 1: Hospital admission-based incidence rates (per 100,000 population) of TBI for males and females in Belgium, 2003- 2012.

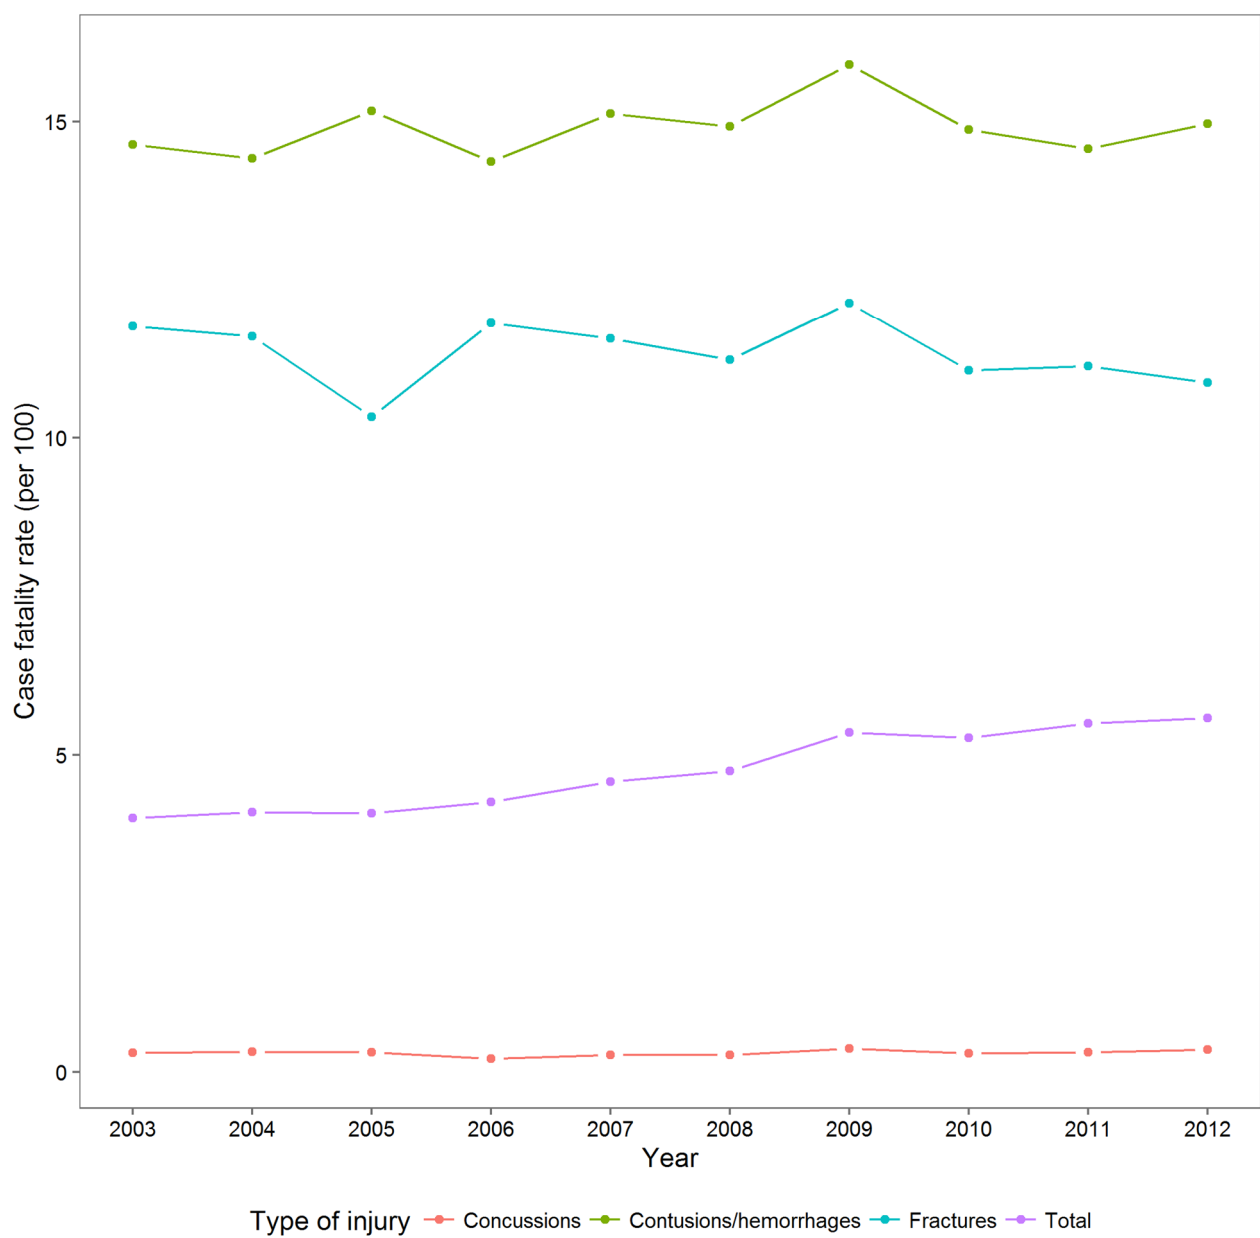

ESM figure 2: Case fatality rates (per 100 hospitalized patients) in function of diagnostic groups, 2003-2012.
